# Supplementary material
Source: Research Square preprint supplement (doi:10.21203/rs.3.rs-9264383/v1)
Supplement: Supplementary file 1 [file 72e265450bf9217a50ac771b.xlsx]

## Sheet: Sheet1
Tab.S1 Amino acid substitution sites (identified by analogy with GII.4) in the norovirus VP1 protein of type GII.17.
Cluster	Sequence Information （GenBank/Nation/Year）	16	22	24	37	40	75	144	169	171	172	173	174	407	410	421	432	436	440	443	444	445	447	448	452	459	470	493	499	510	513	538	234	244	246	250	256	258	279	281	289	290	291	293	294			295	296
A	KC597139.1/GUF/1978/GII.17P4	T	I	H	I	P	I	L	N	Q	P	A	N	R	H	V	F	N	A	V	S	D	V	I	L	Y	D	T	A	S	Y	V	I	A	I	Y	N	N	L	S	K	L	T	D	V	H	Q	S	H
	AY502009.1/USA/2002	T	I	N	I	P	I	L	N	Q	P	A	N	R	H	I	F	N	A	V	S	D	V	I	L	H	D	T	A	S	Y	V	I	A	I	F	N	N	L	S	R	L	T	D	V	D	G	S	H
B	MH218591.1/UK/2014/GII.17P16	T	I	N	I	P	I	L	N	Q	P	A	N	R	H	V	F	N	A	I	S	D	V	I	L	H	D	T	A	S	Y	V	I	V	V	F	N	N	Q	S	K	I	T	D	V	R	P	S	H
	MW305660.1/PY/2005/GII.17P13	A	I	T	L	A	V	L	N	R	P	S	E	N	A	V	F	N	A	V	S	E	I	I	L	H	D	T	S	S	Y	V	I	A	I	F	N	N	L	T	K	I	S	D	V	Q	S	S	H
NA	AB684681.2/JPN/1976	A	G	N	I	P	I	L	N	Q	P	A	N	D	R	V	F	N	S	Y	N	Q	I	I	I	H	E	T	A	A	Y	A	L	A	I	F	V	Q	L	T	R	V	T	E	T	-	-	D	N
C1	AB983218./JPN/2014/Kawasaki323	A	G	N	I	P	I	L	N	Q	P	N	S	D	L	V	F	F	S	Y	N	Q	I	V	I	H	D	S	A	A	Y	A	L	V	I	F	V	Q	L	S	R	V	T	E	T	-	-	D	H
	LC043167.1/JPN/2013	A	G	N	I	P	I	L	N	Q	P	N	S	D	L	V	F	F	S	Y	N	Q	I	V	I	H	D	S	A	A	Y	A	L	V	I	F	V	Q	L	S	R	V	T	E	T	-	-	D	H
C2	MK907790.1/FRA/2014	A	G	N	I	P	I	I	N	Q	P	N	S	D	V	V	F	F	S	Y	N	Q	I	I	I	H	D	S	A	A	Y	A	L	V	I	F	V	Q	L	S	R	V	T	E	T	-	-	D	N
	MW661253.1/CAN/2015	A	G	N	I	P	I	I	N	Q	P	N	S	D	V	V	F	F	S	Y	N	Q	I	I	I	H	D	S	A	A	Y	A	L	V	I	F	V	Q	L	S	R	V	T	E	T	-	-	D	N
	OP805362.1/RO/2021	A	G	N	I	P	I	I	N	Q	P	N	S	D	V	V	L	S	S	Y	N	Q	I	I	I	H	D	S	A	A	Y	A	L	V	I	F	V	Q	L	S	R	V	T	E	T	-	-	D	N
	PQ310354.1/USA/2024	A	G	N	I	P	I	I	N	Q	S	N	S	D	V	V	F	S	S	Y	N	Q	I	I	I	H	E	S	A	A	Y	A	L	V	I	F	V	Q	L	S	R	V	T	E	T	-	-	D	N
	2414YC05/CHN/2024	A	G	N	I	P	I	I	N	Q	P	N	S	D	V	V	F	S	S	Y	N	Q	I	I	I	H	E	S	A	A	Y	A	L	V	I	F	V	Q	L	S	R	V	T	E	T	-	-	D	N
	HK9-2/CHN/2024	A	G	N	I	P	I	I	N	Q	P	N	S	D	V	V	F	S	S	Y	N	Q	I	I	I	H	E	S	A	A	Y	A	L	V	I	F	V	Q	L	S	R	V	T	E	T	-	-	D	N
	XJ1/CHN/2024	A	G	N	I	P	I	I	N	Q	P	N	S	D	V	V	F	S	S	Y	N	Q	I	I	I	H	E	S	A	A	Y	A	L	V	I	F	V	Q	L	S	R	V	T	E	T	-	-	D	N
D	LC037415.1/JPN/2015/Kawasaki308	A	G	N	I	P	I	L	S	Q	P	N	S	N	E	V	F	F	S	Y	N	Q	I	I	I	H	D	S	A	A	H	A	L	V	I	F	V	Q	L	T	R	V	T	Q	I	-	-	N	Q
	KR020503.1/CHN/2014/GZ41621	A	G	N	I	P	I	L	S	Q	P	N	S	N	E	V	F	F	S	Y	N	Q	I	I	I	H	D	S	A	A	H	A	L	V	I	F	V	Q	L	S	R	V	T	Q	I	-	-	N	Q
	OP805360.1/RO/2015	A	G	N	I	P	I	L	S	Q	P	N	S	N	E	V	F	F	S	Y	N	Q	I	I	I	H	D	S	A	A	H	A	L	V	I	F	V	Q	L	S	R	V	T	Q	I	-	-	N	Q
	NJ302-21/CHN/2022	A	G	N	I	P	I	L	S	Q	P	N	S	N	E	V	F	F	S	Y	N	Q	I	I	I	H	D	S	A	A	H	A	L	V	I	F	V	Q	L	T	R	V	T	Q	I	-	-	N	Q
	J2022SZ015/CHN/2022	A	G	N	I	P	I	L	S	Q	P	N	S	N	E	V	F	F	S	Y	N	Q	I	I	I	H	D	S	A	A	H	A	L	V	I	F	V	Q	L	T	R	V	T	Q	M	-	-	N	Q
	SX23017/CHN/2023	A	G	N	I	P	I	L	S	Q	P	N	S	N	E	V	F	F	S	Y	N	Q	I	I	I	H	D	S	A	A	H	A	L	V	I	F	V	Q	L	T	R	V	T	Q	I	-	-	N	Q
	SZ257/CHN/2023	A	G	N	I	P	I	L	S	Q	P	N	S	N	E	V	F	Y	S	Y	N	Q	I	I	I	H	D	S	A	A	H	A	L	V	I	F	V	Q	L	T	R	V	T	Q	I	-	-	N	Q
Cluster	Sequence Information （GenBank/Nation/Year）	297	298	299	304	310	311	315	327	329	330	333	334	339	340	341	342	343	346	347	348	350	351	352	354	356	357	365	367	368	369	371	372	373	376	377	378	379	382	388	389	390	391	392	393	394	395	396	398
A	KC597139.1/GUF/1978/GII.17P4	D	H	D	T	P	F	E	T	L	L	V	A	S	N	P	N	T	A	H	E	V	I	S	T	S	Q	I	F	G	-	T	S	D	Q	L	Q	Q	K	I	K	-	V	E	S	G	H	D	D
	AY502009.1/USA/2002	D	H	D	T	P	F	E	T	L	L	V	A	S	N	P	N	T	A	H	E	V	V	S	T	S	Q	V	F	G	-	T	S	T	Q	L	Q	Q	K	I	K	-	I	E	S	G	H	E	D
B	MH218591.1/UK/2014/GII.17P16	D	H	Q	T	P	F	E	T	L	L	V	A	P	N	P	N	T	A	H	E	V	I	S	T	S	Q	I	F	G	-	T	S	E	I	V	G	Q	K	I	K	-	I	E	D	G	H	A	D
	MW305660.1/PY/2005/GII.17P13	Q	H	D	T	P	F	D	T	L	L	V	A	A	G	N	N	T	A	H	E	V	I	A	T	T	Q	V	F	G	-	E	S	D	Q	V	G	P	K	I	K	-	V	E	T	G	H	P	R
NA	AB684681.2/JPN/1976	P	N	P	Q	T	Y	D	R	L	L	V	A	D	A	P	G	S	A	H	E	V	I	S	T	P	Q	I	F	R	-	T	S	E	R	T	G	Q	R	I	N	-	D	E	D	N	H	P	N
C1	AB983218./JPN/2014/Kawasaki323	R	H	R	Q	T	Y	D	K	V	V	V	A	D	A	P	G	S	A	H	E	V	I	S	Y	P	Q	V	F	R	-	N	D	N	Q	-	L	Q	K	I	N	-	D	D	G	D	H	P	R
	LC043167.1/JPN/2013	R	H	R	Q	T	Y	D	K	V	V	V	A	D	A	P	G	S	A	H	E	V	I	S	Y	P	Q	V	F	R	-	N	D	N	Q	-	L	Q	K	I	N	-	D	D	G	D	H	P	R
C2	MK907790.1/FRA/2014	P	N	P	Q	T	Y	D	K	V	V	V	A	D	A	P	G	S	A	H	E	V	I	S	Y	P	K	V	F	R	-	N	D	D	Q	-	L	Q	R	I	N	-	D	D	G	N	H	P	R
	MW661253.1/CAN/2015	P	N	P	Q	T	Y	D	K	V	V	V	A	D	A	P	G	S	A	H	E	V	I	S	Y	P	K	V	F	K	-	N	D	D	Q	-	L	Q	R	I	N	-	D	D	G	N	H	P	R
	OP805362.1/RO/2021	P	N	P	Q	T	Y	D	K	V	V	M	A	D	A	P	G	S	A	H	E	V	I	S	Y	P	R	V	F	K	-	N	D	N	Q	-	L	Q	R	I	N	-	D	D	G	D	H	P	R
	PQ310354.1/USA/2024	T	N	T	Q	T	Y	D	K	V	V	M	A	D	A	P	G	S	S	H	E	V	I	S	Y	P	R	V	F	K	-	N	D	D	Q	-	L	Q	R	I	N	-	D	D	G	N	Q	P	R
	2414YC05/CHN/2024	P	N	P	Q	T	Y	D	K	V	V	M	A	D	A	P	G	S	S	H	E	V	I	S	Y	P	R	V	F	K	-	N	D	D	Q	-	L	Q	R	I	N	-	D	D	G	N	Q	P	R
	HK9-2/CHN/2024	P	N	P	Q	T	Y	D	K	V	V	M	A	D	A	P	G	S	S	H	E	V	I	S	Y	P	R	V	F	K	-	N	D	D	Q	-	L	Q	R	I	N	-	D	D	G	N	Q	P	R
	XJ1/CHN/2024	P	N	P	Q	T	Y	D	K	V	V	M	A	D	A	P	G	S	S	H	E	V	I	S	Y	P	R	V	F	K	-	N	D	D	Q	-	L	Q	R	I	N	-	D	D	G	N	Q	P	R
D	LC037415.1/JPN/2015/Kawasaki308	R	Q	R	Q	T	Y	D	K	V	V	M	V	D	A	P	G	S	A	Q	Q	W	V	S	Y	P	Q	V	L	R	I	D	N	D	Q	-	F	Q	K	V	N	D	D	D	D	G	H	P	R
	KR020503.1/CHN/2014/GZ41621	R	Q	R	Q	T	Y	D	K	V	V	M	V	D	A	P	G	S	A	Q	Q	W	V	S	Y	P	Q	V	L	R	I	D	N	D	Q	-	F	Q	K	V	N	D	D	D	D	G	H	P	R
	OP805360.1/RO/2015	R	Q	R	Q	T	Y	D	K	V	V	M	V	D	A	P	G	S	A	Q	Q	W	V	S	Y	P	Q	V	L	R	I	D	N	D	Q	-	F	Q	K	V	N	D	D	D	D	G	H	P	R
	NJ302-21/CHN/2022	R	Q	R	Q	T	Y	D	K	V	V	M	V	D	A	P	G	S	A	Q	Q	W	I	S	Y	P	Q	V	L	R	I	N	N	D	Q	-	F	Q	K	V	N	D	D	D	D	D	H	P	R
	J2022SZ015/CHN/2022	R	Q	R	Q	T	Y	D	K	V	V	M	V	D	A	P	G	S	A	Q	Q	W	I	S	Y	P	Q	V	L	R	I	N	N	D	Q	-	F	Q	K	V	N	D	D	D	D	D	H	P	R
	SX23017/CHN/2023	R	Q	R	Q	T	Y	D	K	V	V	M	V	D	A	P	G	S	A	Q	Q	W	I	S	Y	P	Q	V	L	R	I	N	N	D	Q	-	F	Q	K	V	N	D	D	D	D	D	H	P	R
	SZ257/CHN/2023	R	Q	R	Q	T	Y	D	K	V	V	M	V	D	A	P	G	S	A	Q	Q	W	I	S	Y	P	Q	V	L	R	I	N	N	D	Q	-	F	Q	K	V	N	D	D	D	D	D	H	P	R
Note: The unique mutations of the strains in 2024-2025 are highlighted in bold red in this study.
[truncated: 1 more columns]
